# Supplementary material for: The study of perylene diimide–amino acid derivatives for the fluorescence detection of anions
Source: Royal Society of Chemistry journal article supplement (doi:10.1039/c7ra08005k), 2017-01-01
Supplement: c7ra08005k1.pdf [file c7ra08005k1.pdf]

## Supporting Information

### **The study of perylene diimide-amino acids derivatives on fluorescent detecting of anions**

ChaoYuan Chen , Ke Wang , Lei Lei Gu , Hui Li\*

*Key Laboratory of Cluster Science of Ministry of Education, School of Chemistry, Beijing Key Laboratory of Photoelectronic/Electrophotonic Conversion Materials, Chemical Engineering, Beijing Institute of Technology, Beijing 100081, P. R. China.*

\*E-mail address: [lihui@bit.edu.cn](mailto:lihui@bit.edu.cn); Tel: 86-10-68912667

# Contents

Section 1  $^1\text{H}$  NMR and  $^{13}\text{C}$  NMR spectra of the **H<sub>2</sub>PDIAAs**

Section 2 IR of the **H<sub>2</sub>PDIAAs**

Section 3 ESI-MS of the **H<sub>2</sub>PDIAAs**

Section 4 UV-vis absorbance of the **H<sub>2</sub>PDIAAs** with anions

Section 5 Fluorescence of the **H<sub>2</sub>PDIAAs** with anions

Section 6 Fluorescence lifetime decay of the **H<sub>2</sub>PDIAAs**

Section 7  $^1\text{H}$ -NMR of the **H<sub>2</sub>PDIAIa** with TBAOH

## Section 1 $^1\text{H}$ NMR and $^{13}\text{C}$ NMR spectra of the $\text{H}_2\text{PDIAa}$ s

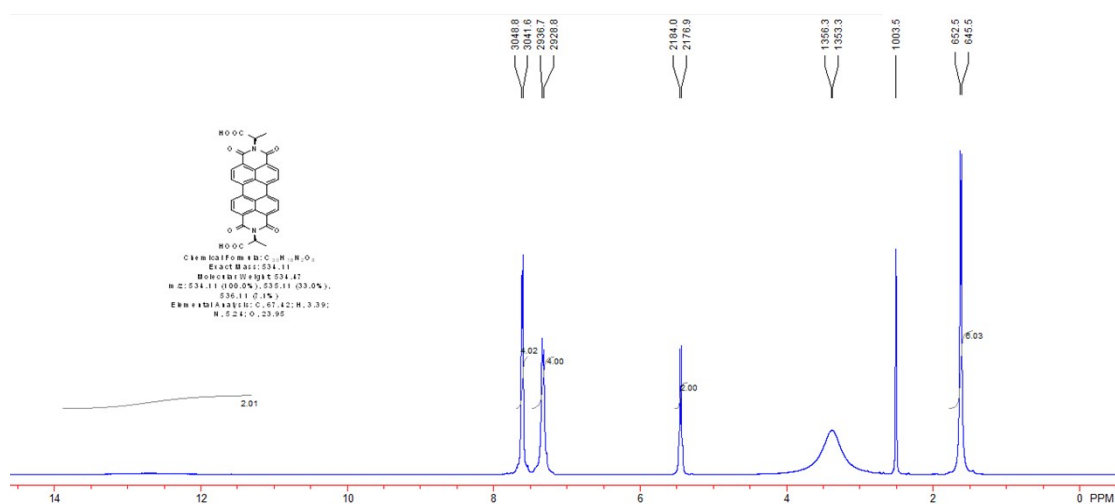

Fig.S1 Spectra of the  $\text{H}_2\text{PDIAa}$  in  $\text{DMSO}-d^6$  solution.

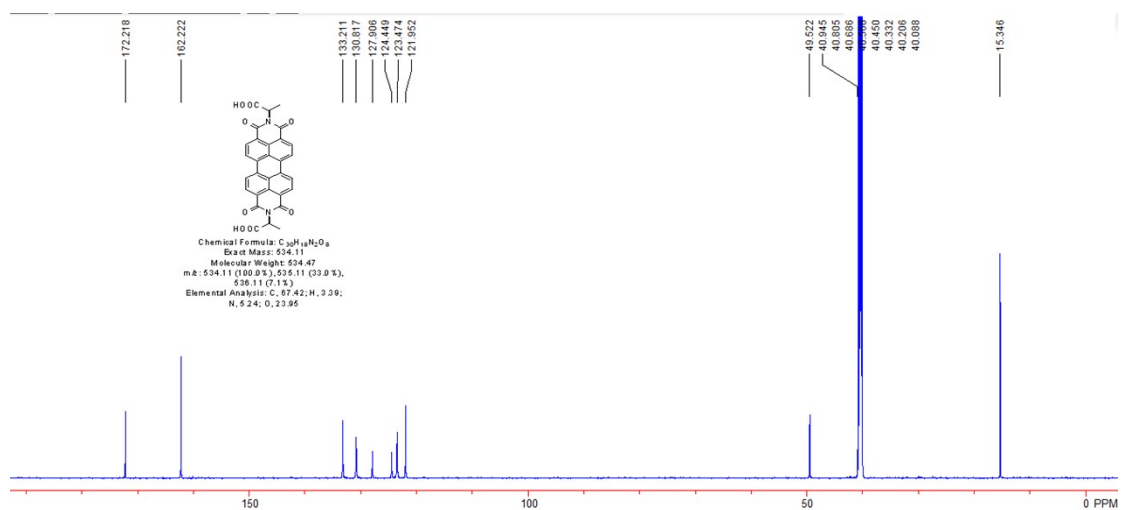

Fig.S2  $^{13}\text{C}$  NMR spectra of the  $\text{H}_2\text{PDIAa}$  in  $\text{DMSO}-d^6$  solution.



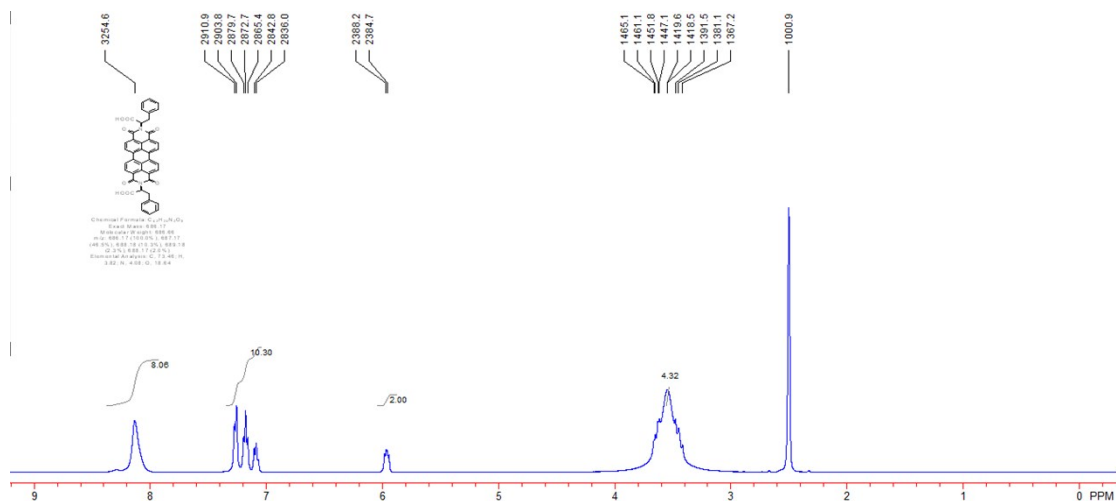

Fig.S5  $^1H$  NMR spectra of the  $H_2PDIPhe$  in  $DMSO-d_6$  solution.

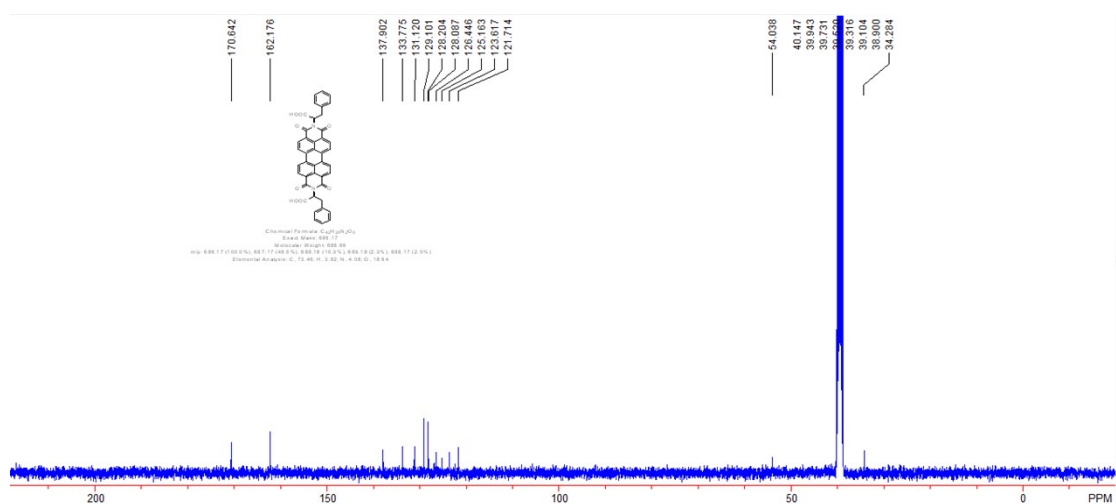

Fig.S6  $^{13}C$  NMR spectra of the  $H_2PDIPhe$  in  $DMSO-d_6$  solution.

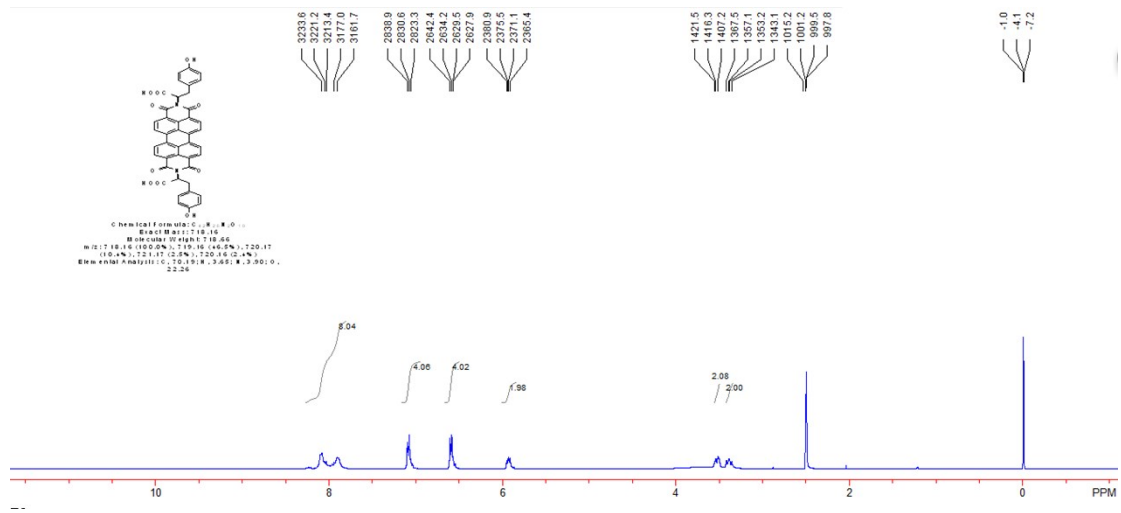

Fig.S7  $^1\text{H}$  NMR spectra of the  $\text{H}_2\text{PDITyr}$  in  $\text{DMSO-}d^6$  solution.

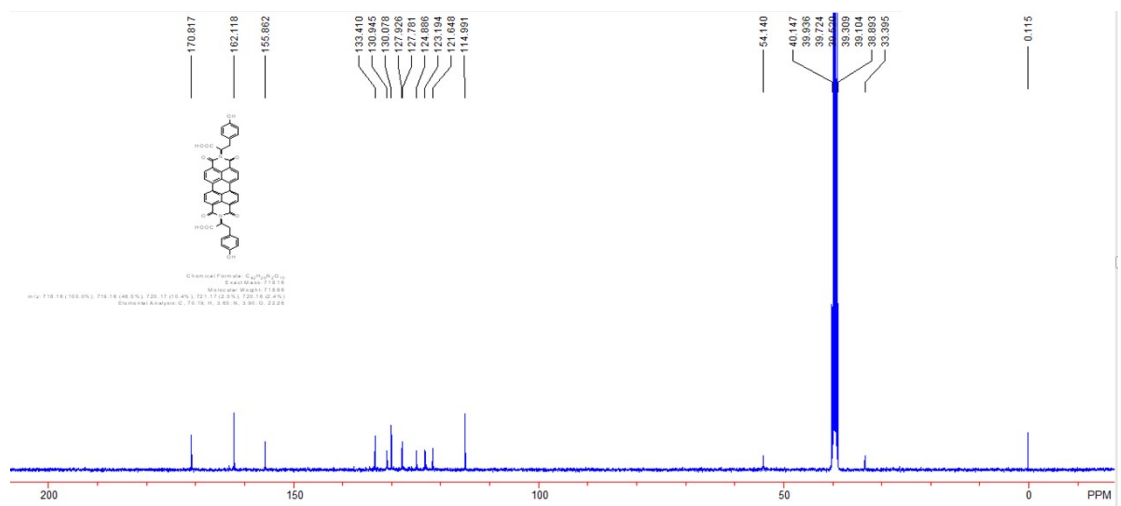

Fig.S8  $^{13}\text{C}$  NMR spectra of the  $\text{H}_2\text{PDITyr}$  in  $\text{DMSO-}d^6$  solution.

## Section 2 IR of the H<sub>2</sub>PDIAAs

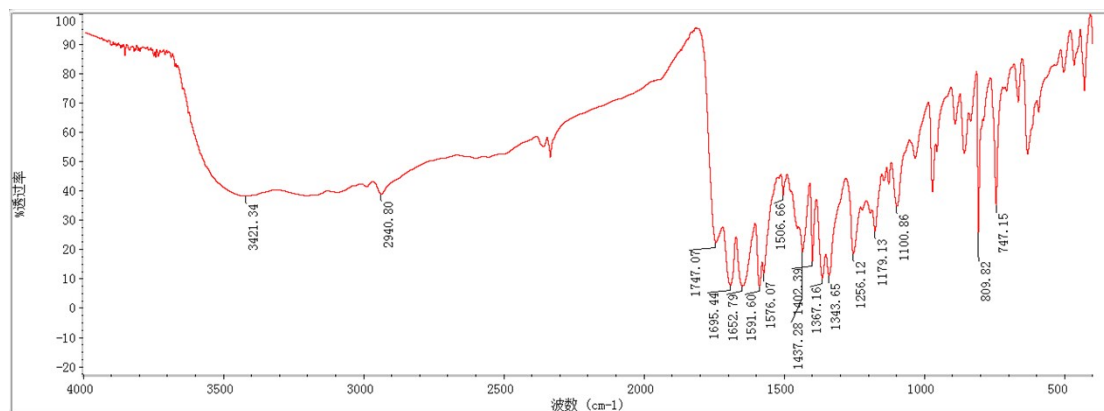

Fig.S9 IR of the H<sub>2</sub>PDIAa.

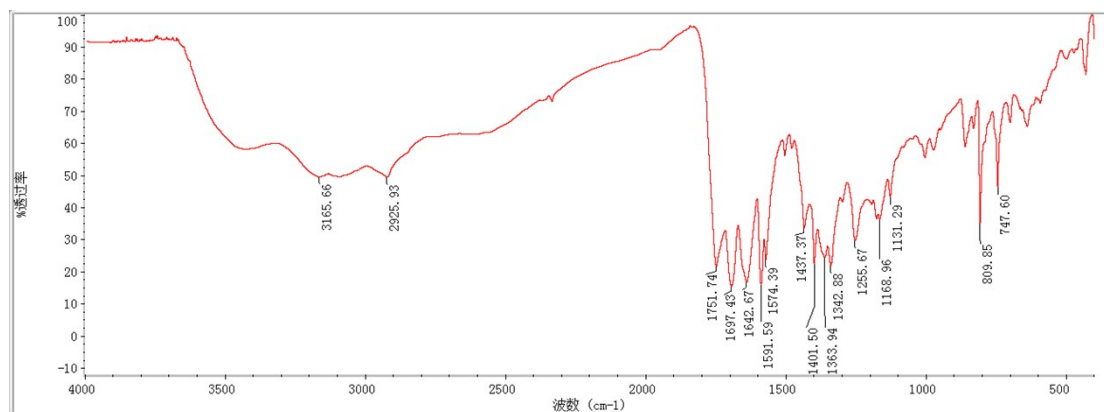

Fig.S10 IR of the H<sub>2</sub>PDIGlu.

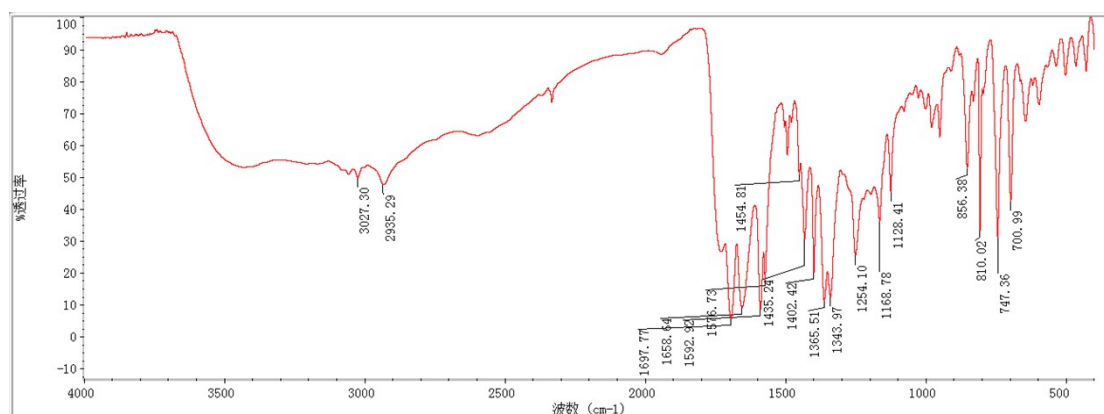

Fig.S11 IR of the H<sub>2</sub>PDIPhe.

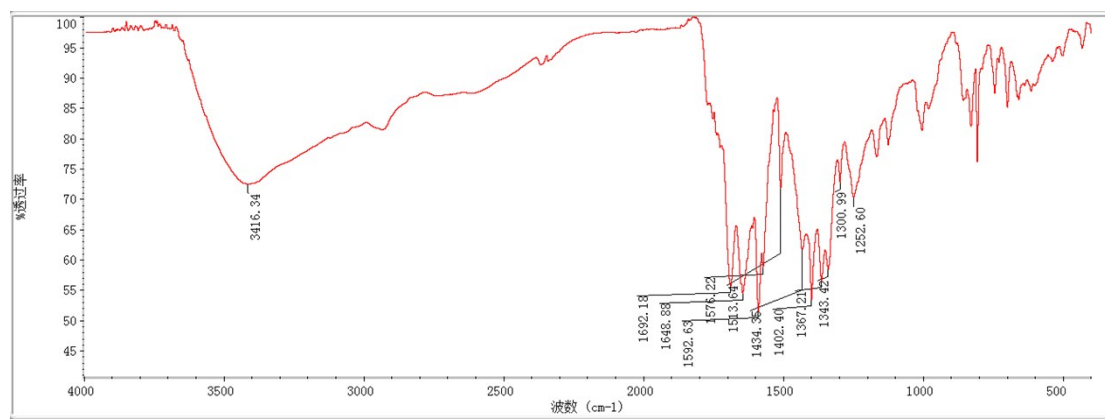

Fig.S12 IR of the H<sub>2</sub>PDITyr.



### Section 3 ESI-MS of the H<sub>2</sub>PDIAAs

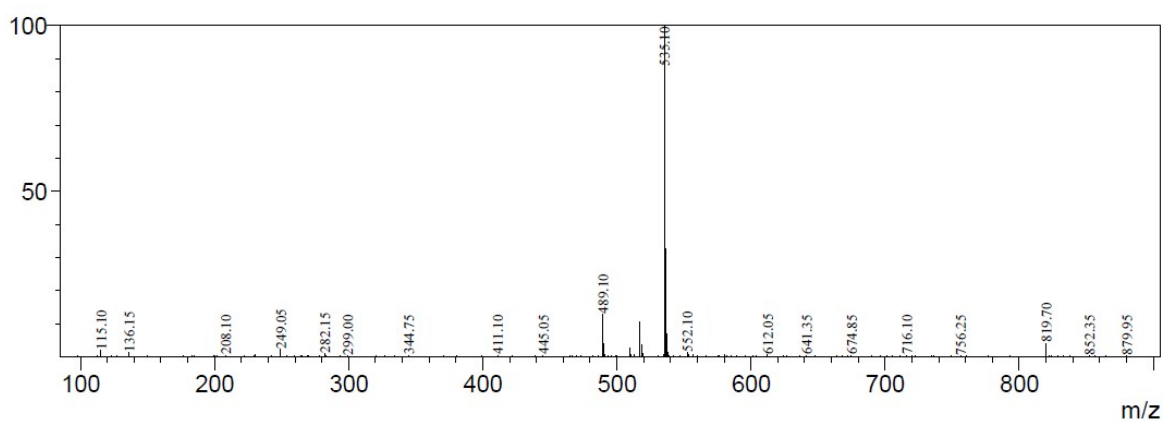

Fig.S13 ESI-MS of the H<sub>2</sub>PDIAa.

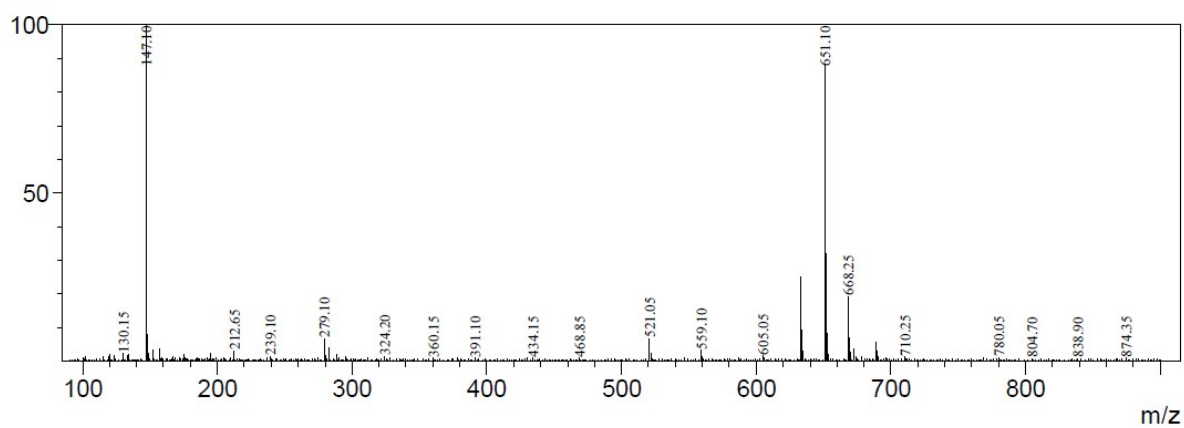

Fig.S14 ESI-MS of the H<sub>2</sub>PDIGlu.

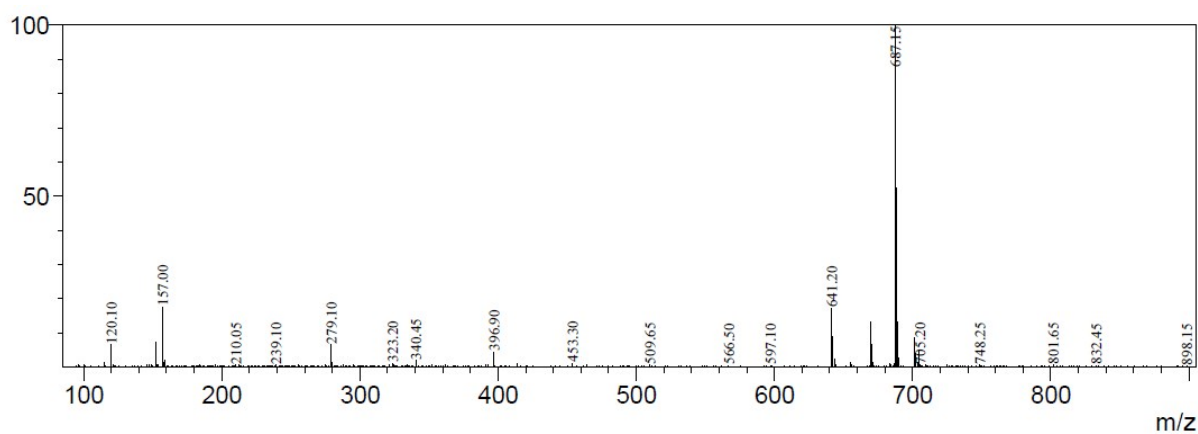

Fig.S15 ESI-MS of the H<sub>2</sub>PDIPhe.

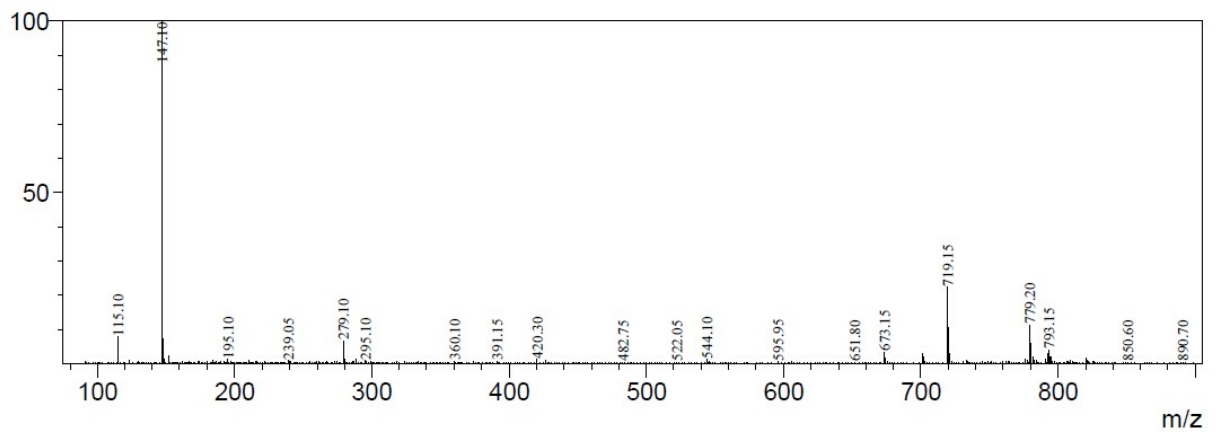

**Fig.S16** ESI-MS of the H<sub>2</sub>PDITyr

## Section 4 UV-Vis absorbance of the H<sub>2</sub>PDIAAs with anions

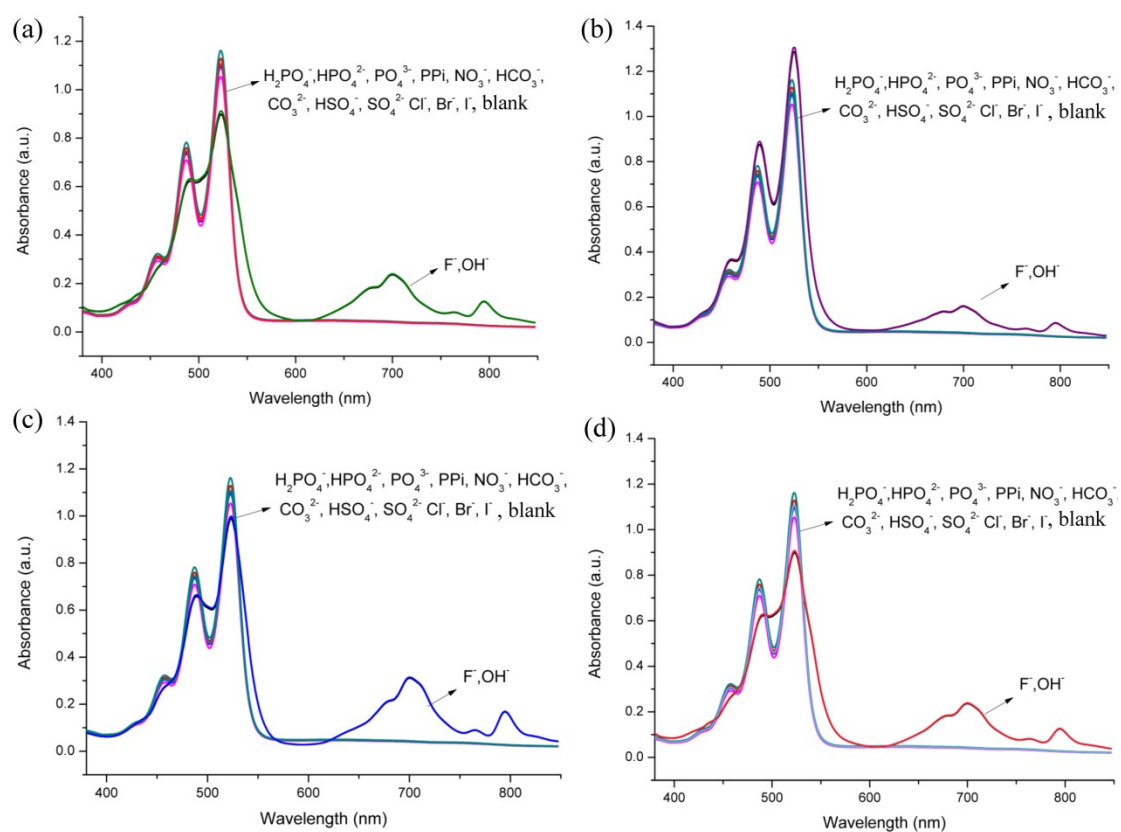

**Fig.S17** UV-vis spectra of H<sub>2</sub>PDIAAs (1 × 10<sup>-5</sup> M) with the different anions(6 eq. each) in DMF, (a) H<sub>2</sub>PDIAIa, (b) H<sub>2</sub>PDIGlu, (c) H<sub>2</sub>PDIPhe, (d) H<sub>2</sub>PDITyr.

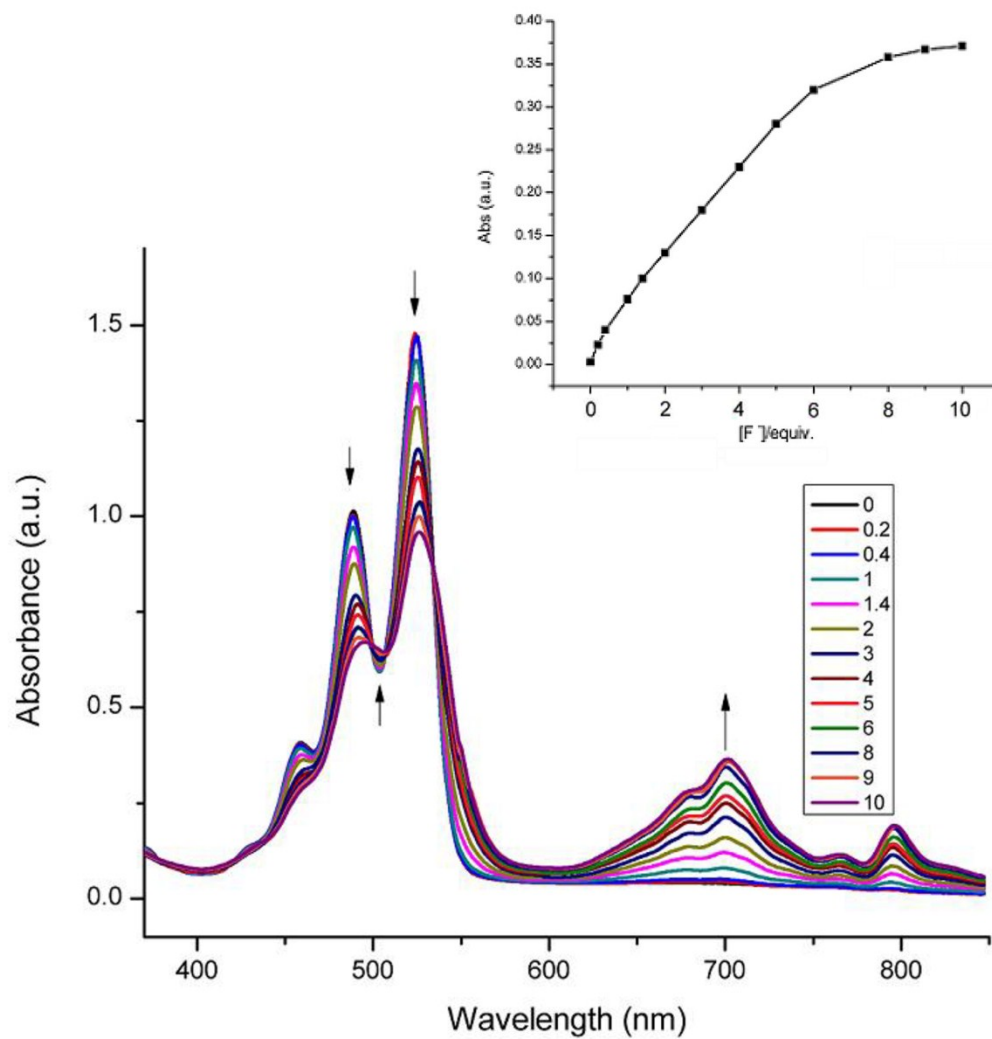

**Fig.S18** Absorbance changes of  $H_2PDIGlu$  ( $1 \times 10^{-5} M$ ) in DMF on addition of 0-10 equivalents of TBAF. Inset: UV absorption intensity at 700 nm vs concentration of  $F^-$ .

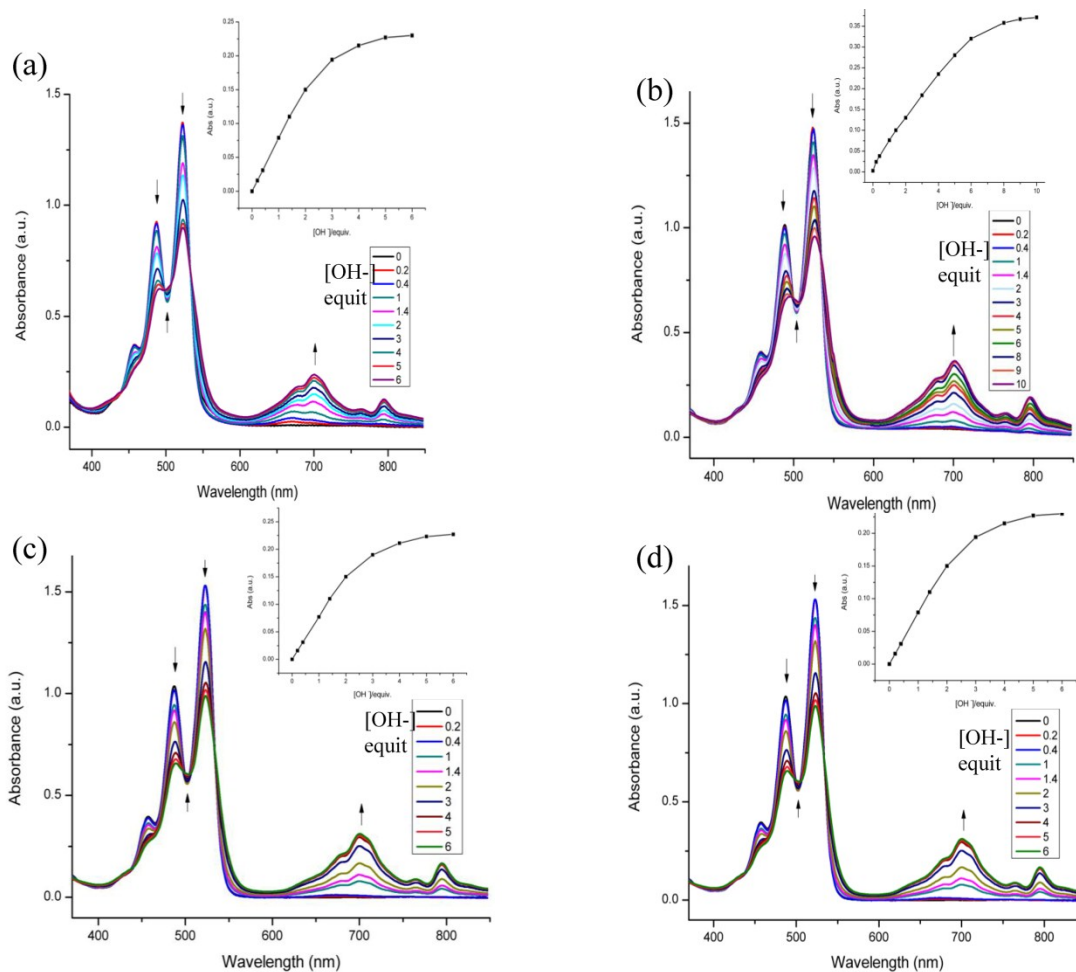

**Fig.S19** UV-vis titration of H<sub>2</sub>PDIAAs with TBOH in DMF (1 × 10<sup>-5</sup> M), (a) H<sub>2</sub>PDIAIa, (b) H<sub>2</sub>PDIGlu, (c) H<sub>2</sub>PDIPhe, (d) H<sub>2</sub>PDITyr, Inset: UV absorbance intensity at 700 nm vs concentration of OH<sup>-</sup> ion.

## Section 5 Fluorescence of the H<sub>2</sub>PDIAAs with anions

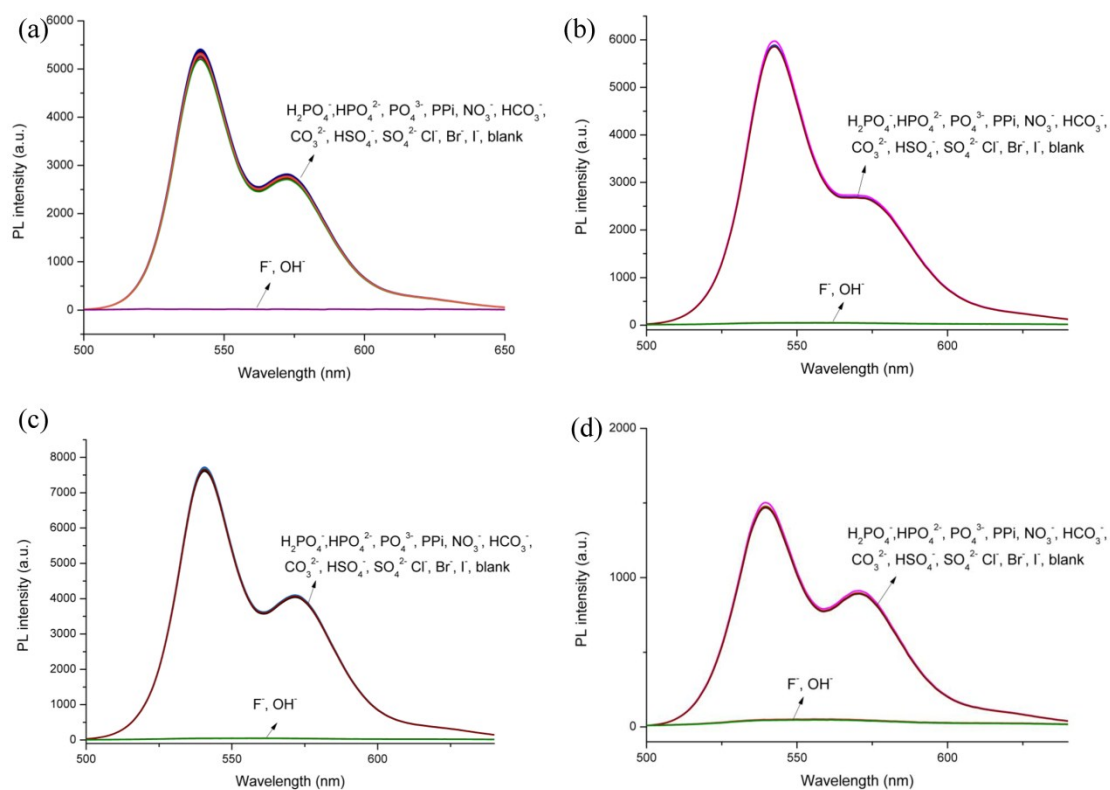

**Fig.S20** Fluorescence spectra of H<sub>2</sub>PDIAAs (1 × 10<sup>-5</sup> M) with the different anions(6 eq, each) in DMF (λ<sub>ex</sub> = 525 nm), (a) H<sub>2</sub>PDIAIa, (b) H<sub>2</sub>PDIGlu, (c) H<sub>2</sub>PDIPhe, (d) H<sub>2</sub>PDITyr.

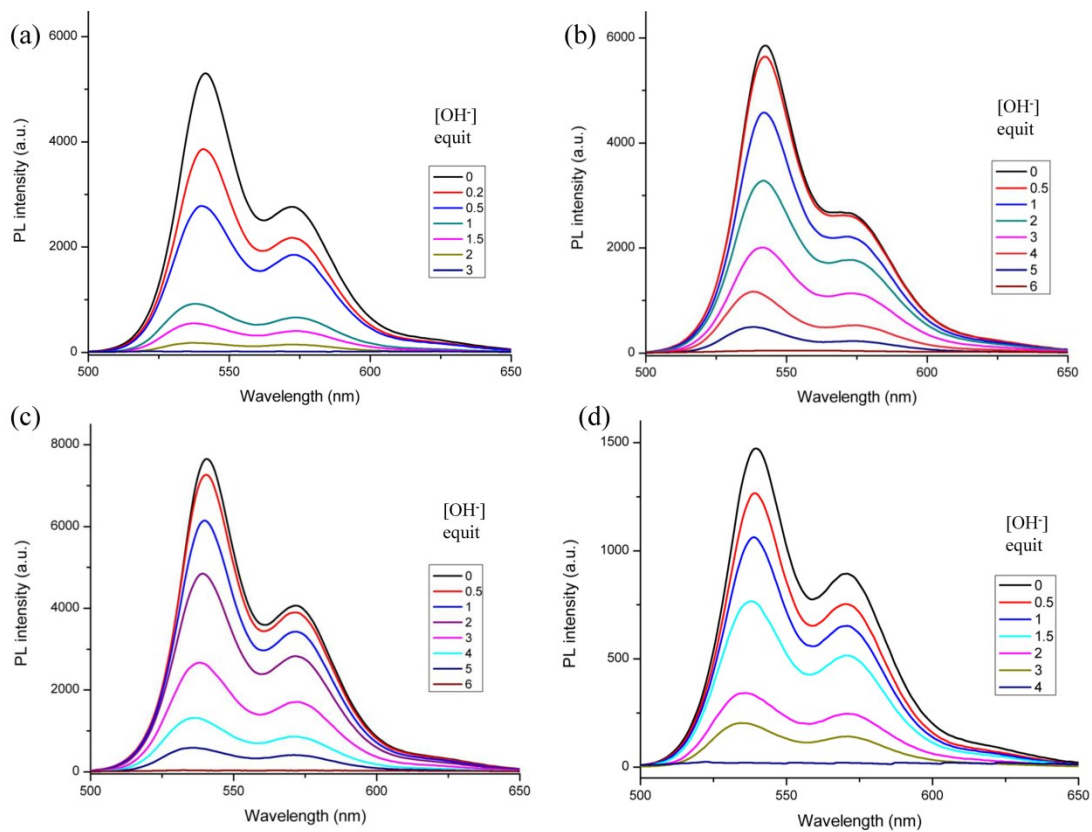

**Fig.S21** Fluorescence emission of H<sub>2</sub>PDIAAs with TBAOH titration in DMF (1 × 10<sup>-5</sup> M) (λ<sub>ex</sub> = 525 nm), (a) H<sub>2</sub>PDIAIa, (b) H<sub>2</sub>PDIGlu, (c) H<sub>2</sub>PDIPhe, (d) H<sub>2</sub>PDITyr.

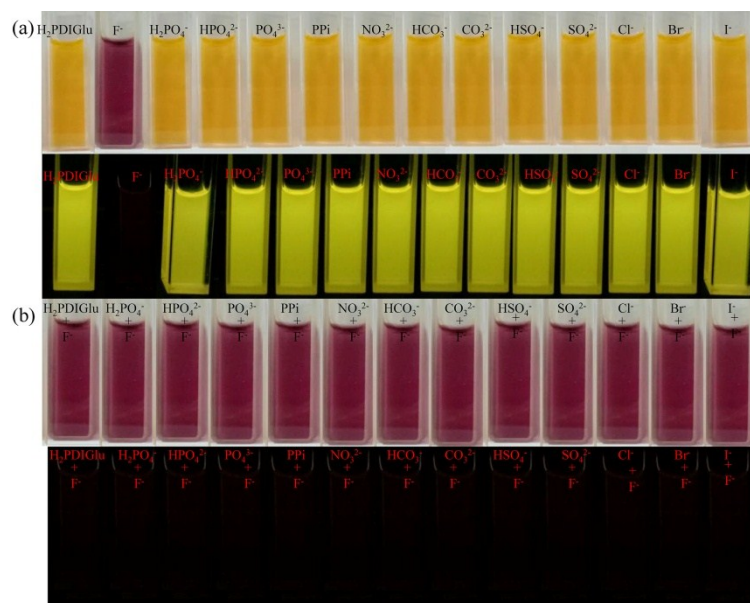

**Fig.S22** (a) The photographs of colorimetric identification by naked eye and fluorescence emission ( $\lambda = 365$  nm) for H<sub>2</sub>PDIGlu with various anions(6 eq, each), (b) The photographs of colorimetric identification by naked eye and fluorescence emission ( $\lambda = 365$  nm) of H<sub>2</sub>PDIGlu-F<sup>-</sup> ion with various ions (6 eq, each).



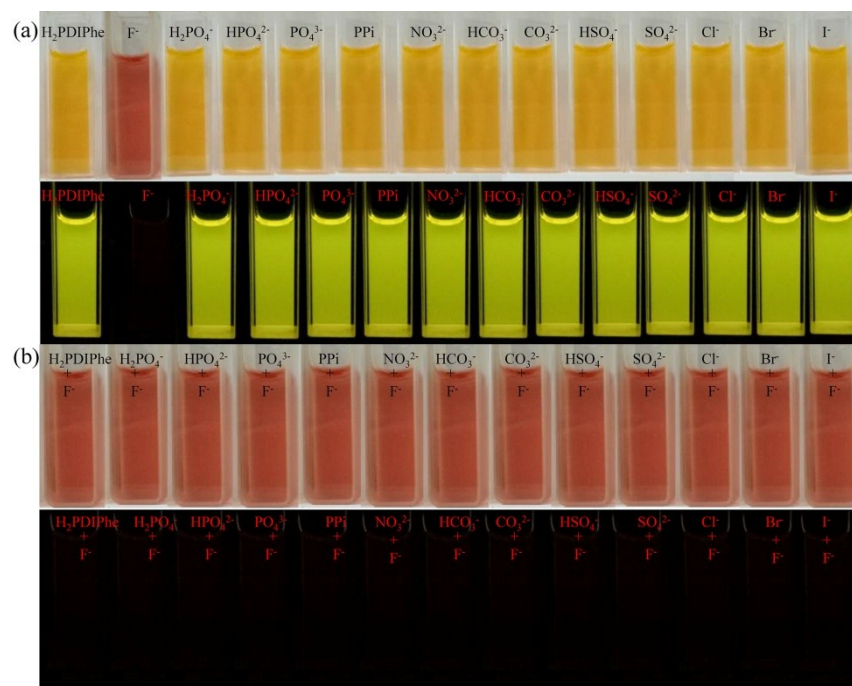

**Fig.S23** (a) The photographs of colorimetric identification by naked eye and fluorescence emission ( $\lambda = 365$  nm) for H<sub>2</sub>PDIPhe with various anions(6 eq, each), (b) The photographs of colorimetric identification by naked eye and fluorescence emission ( $\lambda = 365$  nm) of H<sub>2</sub>PDIPhe-F<sup>-</sup> ion with various ions (6 eq, each).

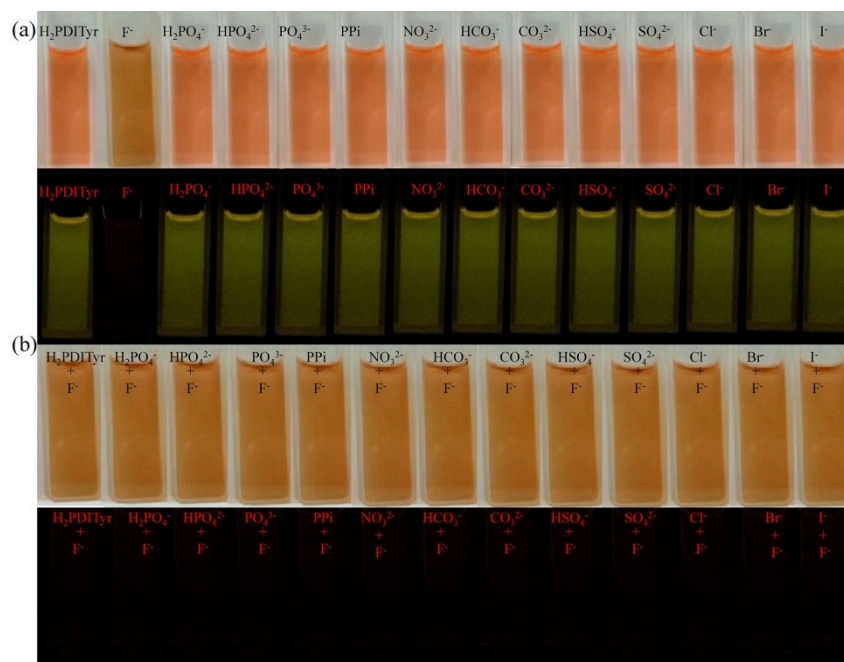

**Fig.S24** (a) The photographs of colorimetric identification by naked eye and fluorescence emission ( $\lambda = 365$  nm) for  $H_2PDITyr$  with various anions(6 eq, each), (b) The photographs of colorimetric identification by naked eye and fluorescence emission ( $\lambda = 365$  nm) of  $H_2PDITyr-F^-$  ion with various ions (6 eq, each).

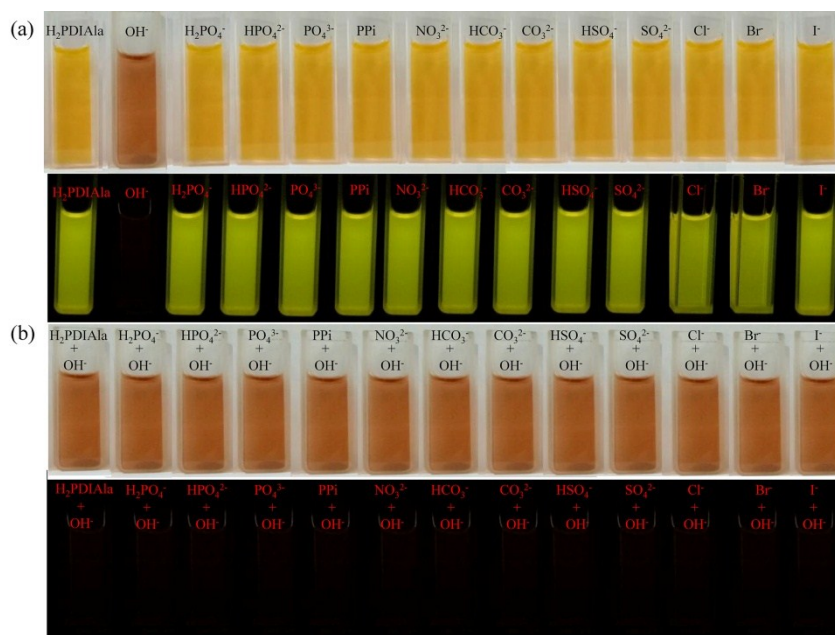

**Fig.S25** (a) The photographs of colorimetric identification by naked eye and fluorescence emission ( $\lambda = 365$  nm) for H<sub>2</sub>PDIALa with various anions(6 eq, each), The photographs of colorimetric identification by naked eye and fluorescence emission ( $\lambda = 365$  nm) of H<sub>2</sub>PDIALa-OH ion with various ions (6 eq, each).

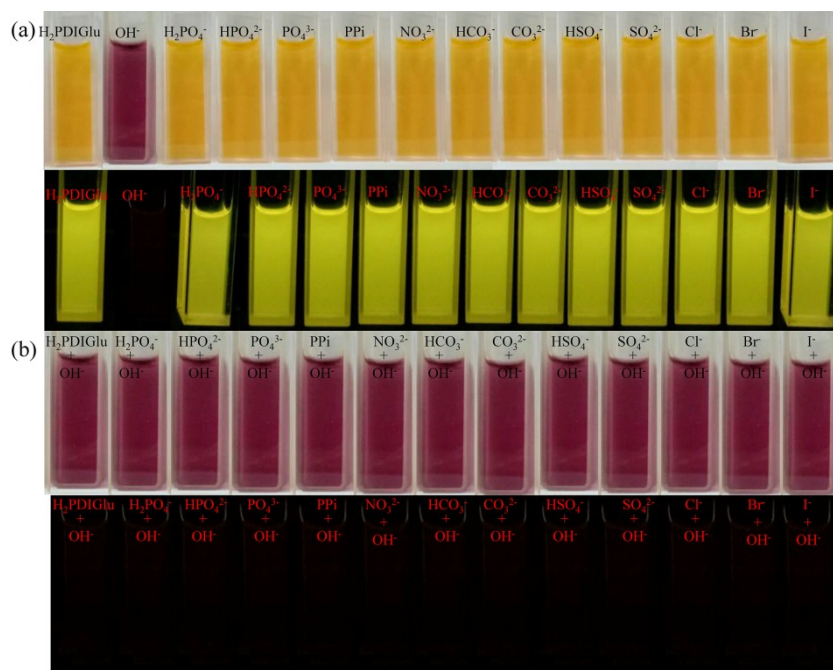

**Fig.S26** (a) The photographs of colorimetric identification by naked eye and fluorescence emission ( $\lambda = 365$  nm) for H<sub>2</sub>PDIGlu with various anions(6 eq, each), (b) The photographs of colorimetric identification by naked eye and fluorescence emission ( $\lambda = 365$  nm) of H<sub>2</sub>PDIGlu-OH<sup>-</sup> ion with various ions (6 eq, each).

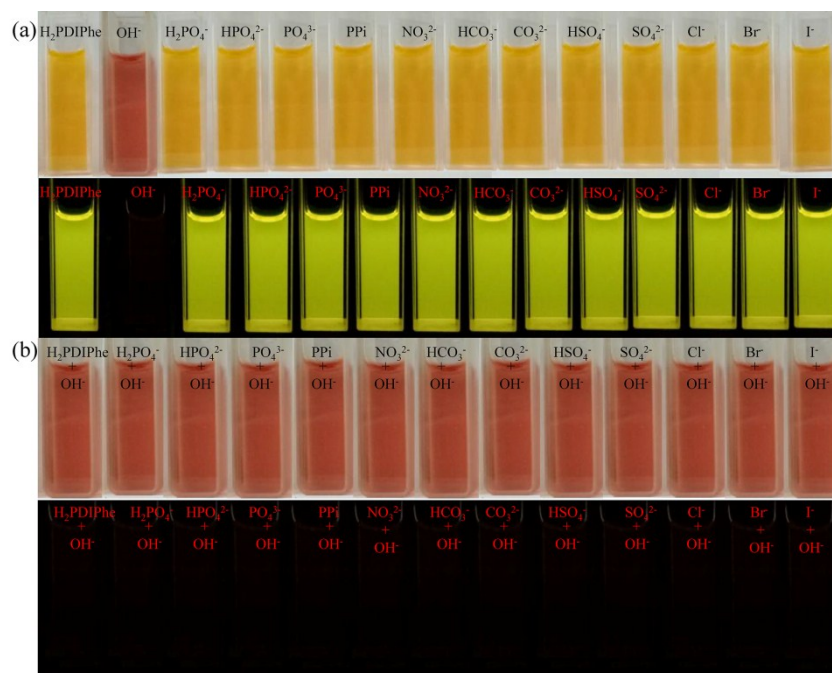

**Fig.S27** (a) The photographs of colorimetric identification by naked eye and fluorescence emission ( $\lambda = 365 \text{ nm}$ ) for H<sub>2</sub>PDIPhe with various anions(6 eq, each), (b) The photographs of colorimetric identification by naked eye and fluorescence emission ( $\lambda = 365 \text{ nm}$ ) of H<sub>2</sub>PDIPhe-OH<sup>-</sup> ion with various ions (6 eq, each).

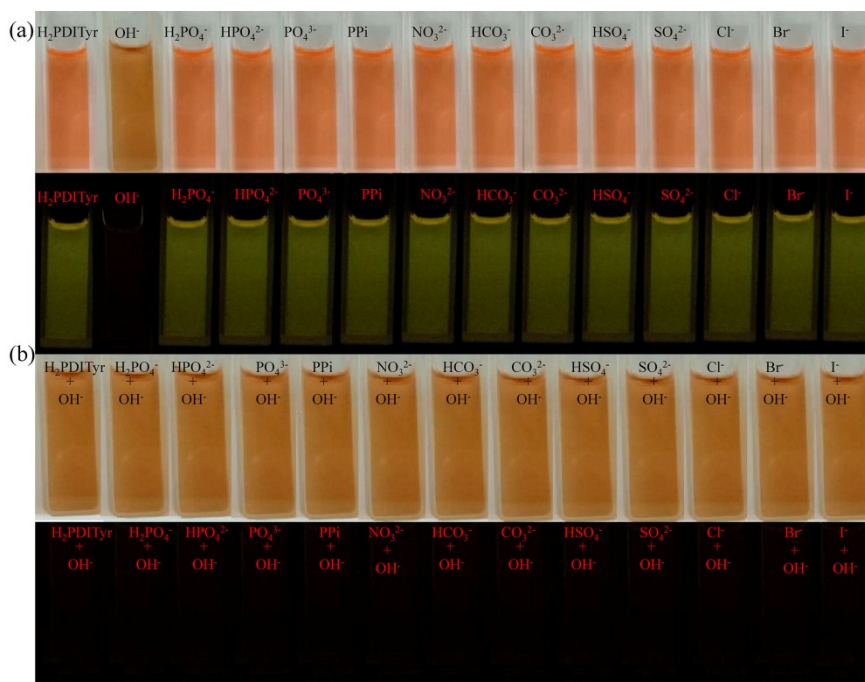

**Fig.S28** (a) The photographs of colorimetric identification by naked eye and fluorescence emission ( $\lambda = 365$  nm) for H<sub>2</sub>PDITyr with various anions(6 eq, each), (b) The photographs of colorimetric identification by naked eye and fluorescence emission ( $\lambda = 365$  nm) of H<sub>2</sub>PDITyr-OH<sup>-</sup> ion with various ions (6 eq, each).

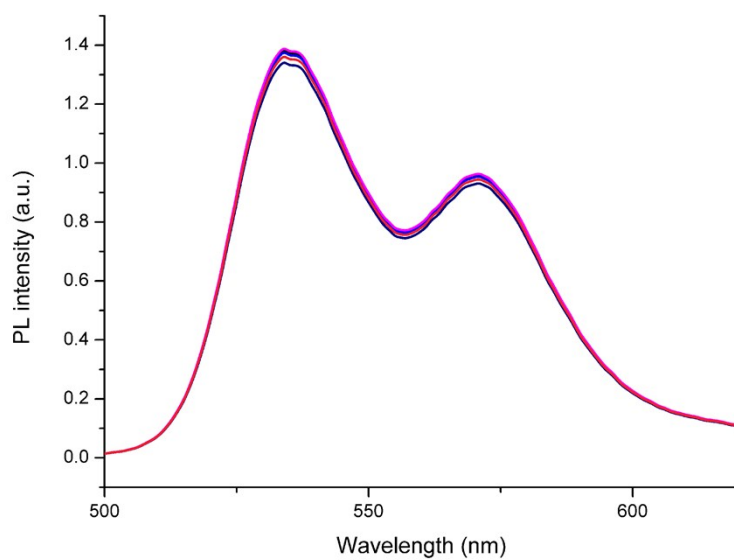

**Fig.S29** Fluorescence spectra of H<sub>2</sub>PDIAIa ( $1 \times 10^{-5}$  M) added the TBAF, and the mixture solution with the different anions(6 eq, each) in DMF ( $\lambda_{\text{ex}} = 525$  nm).

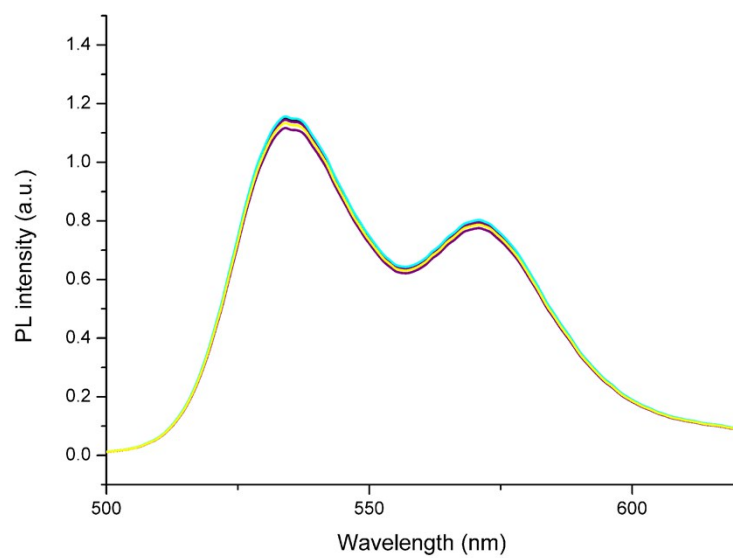

**Fig.S30** Fluorescence spectra of H<sub>2</sub>PDIAla ( $1 \times 10^{-5}$  M) added the TBAOH, and the mixture solution with the different anions(6 eq, each) in DMF ( $\lambda_{\text{ex}} = 525$  nm).



## Section 6. Fluorescence lifetime decay of the H<sub>2</sub>PDIAAs

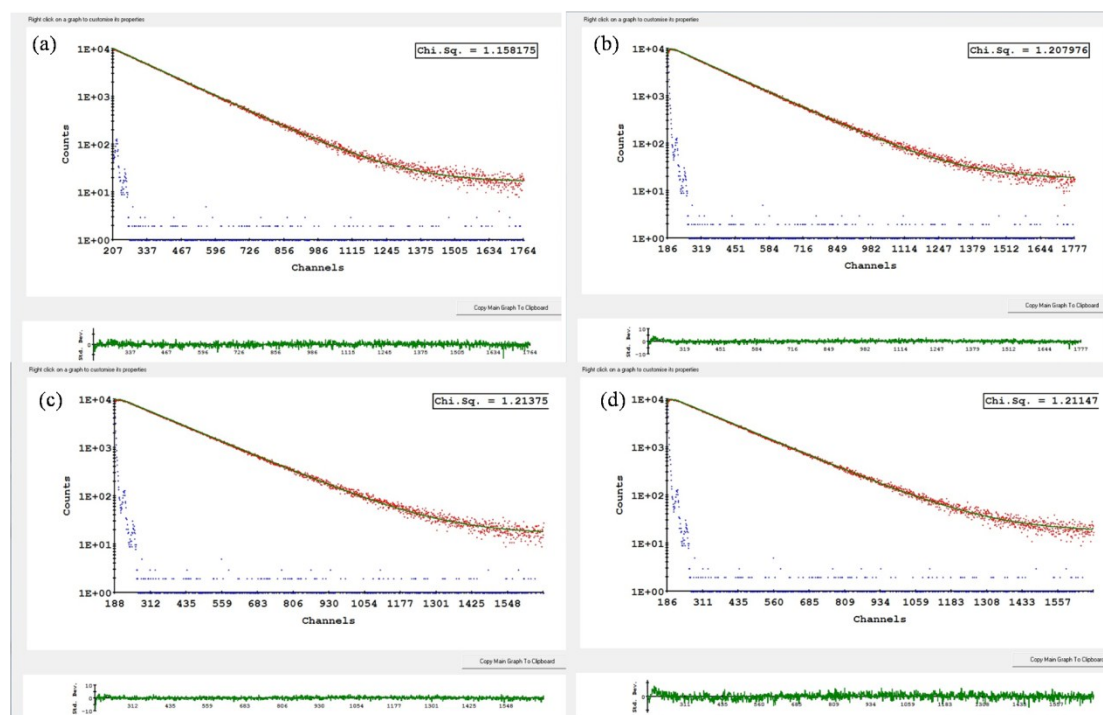

**Fig.S31** Fluorescence lifetime decay of H<sub>2</sub>PDIAAla ( $1 \times 10^{-5}$  M) in DMF. (b) Fluorescence lifetime decay of H<sub>2</sub>PDIGlu. (c) Fluorescence lifetime decay of H<sub>2</sub>PDIPhe. (d) Fluorescence lifetime decay of H<sub>2</sub>PDITyr.

Section 7.  $^1\text{H-NMR}$  of the **H<sub>2</sub>PDIAIa** with TBAOH

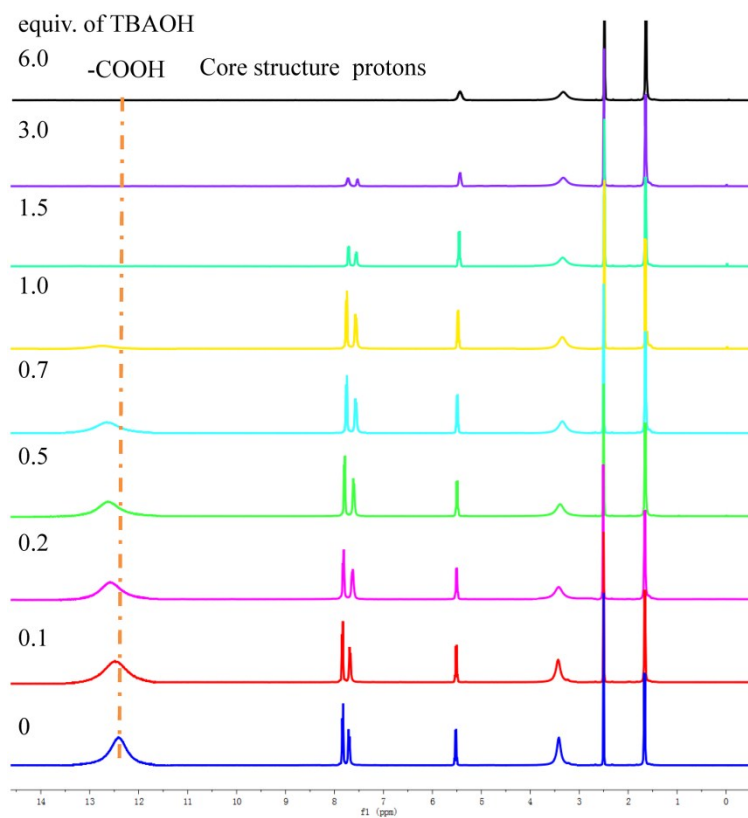

**Fig.S32** The  $^1\text{H-NMR}$  titrations of **H<sub>2</sub>PDIAIa** with TBAOH in  $\text{DMSO-}d_6$ .
